# Supplementary material
Source: publisher figshare collection journal article supplement (https://gsapubs.figshare.com/articles/dataset/_/17265287)
Supplement: Supplementary file 1 [file 1]

## Sheet: SupplData
Time_UTC	MinBT_degC	MaxPlumeHeight_kmasl	UmbrellaRadius_km_-73C	UmbrellaRadius_km_-63C	UmbrellaRadius_km_-53C	UmbrellaRadius_km_-43C	UmbrellaRadius_km_-33C	UmbrellaRadius_km_TotalCloud	UmbrellaRadius_km_Average	GLD_Total_Flashes_PerMin	GLD_CG_Flashes_PerMin
06:33:00	-3	5.5								0	0
06:43:00	-9.8	6.7								0	0
06:53:15	-27	9.4	0	0	0	0	0	3.25572	0.54262	0	0
07:03:15	-49	12.4	0	0	0	1.74078	3.48247	5.63907	1.81039	0.1	0
07:13:15	-56	13.1	0	0	2.45925	5.36425	5.78122	5.78122	3.23099	0.8	0.1
07:23:14	-69	14.9	0	4.44243	7.29094	9.30485	10.8817	13.7621	7.61366	1.90317	0.901503
07:33:14	-72	15.3	0	8.44402	12.0081	13.6576	14.8843	18.3687	11.2271	4.7	1.8
07:43:14	-75	15.7	3.01723	12.9764	16.067	18.1946	19.2983	22.8479	15.4002	3.8	1.6
07:53:14	-79	16	9.62435	20.2638	22.2122	23.87	25.3572	29.0982	21.7376	5.1	2.6
08:03:15	-78	16	16.2541	26.8213	29.3162	30.6433	31.7153	35.9048	28.4425	2.89517	0.599002
08:13:15	-90	17.5	22.5676	33.4256	35.5036	37.339	38.7611	40.7625	34.7265	4.3	0.9
08:23:15	-79	16	29.3704	38.9659	41.6126	43.0414	44.3526	44.7812	40.354	8.8	2.2
08:33:15	-88	17.2	34.6873	44.5674	46.5926	47.2035	47.6064	47.6064	44.7106	16.4	5.1
08:43:15	-81	16.4	38.4312	49.6038	50.7143	50.7771	50.8084	50.8084	48.5239	22.6	7.8
08:53:14	-80	16.4	44.5674	54.3499	54.9614	54.9614	54.9614	54.9614	53.1272	29.2487	8.51419
09:03:14	-81	16.4	50.4942	58.9031	59.7082	59.7082	59.7082	59.7082	58.0384	29.9	11
09:13:14	-83	16.4	55.2503	63.0783	63.3301	63.3301	63.3301	63.3301	61.9415	25.5	8.3
09:23:14	-81	16.4	58.3602	66.517	66.9938	66.9938	66.9938	66.9938	65.4754	25.8	10.1
09:33:15	-81	16.4	61.8039	70.241	70.9175	70.9175	70.9175	70.9175	69.2858	26.7554	8.28619
09:43:15	-82	16.4	64.8204	73.3446	75.9039	75.9039	75.9039	75.9039	73.6301	25.4	8
09:53:14	-87	17.1	66.9938	75.4834	79.3885	79.3885	79.3885	79.3885	76.6719	31.7529	7.41235
10:03:12	-82	16.4	69.0988	77.9726	82.7264	83.4924	83.4924	83.4924	80.0459	31.4047	8.32776
10:13:11	-85	16.8	71.365	80.3846	85.3774	87.5858	87.5858	87.5858	83.3141	27.4457	8.11352
10:23:11	-84	16.7	73.3446	82.7264	88.6694	92.0165	92.0165	92.0165	86.7983	24.3	6.5
10:33:11	-83	16.5	75.2723	85.0037	92.0165	96.2435	96.7384	96.7384	90.3355	26.3	6.8
10:43:07	-84	16.6	76.1133	87.2216	94.5754	99.8153	101.397	101.397	93.42	28.3893	7.75168
10:53:07	-83	16.6	77.5632	89.2062	96.5737	102.645	106.002	106.002	96.3319	34.9	9.9
11:03:05	-83	16.6	77.7682	91.1476	98.854	105.851	110.702	110.846	99.1948	40.0334	10.4348
11:13:05	-83	16.6	78.5825	93.2194	101.867	109.109	115.073	115.899	102.292	50.8	16.3
11:23:02	-83	16.5	78.9865	95.0789	104.642	112.555	119.416	121.268	105.324	59.0955	17.1859
11:33:02	-83	16.5	79.5887	97.0668	106.899	115.899	122.962	126.157	108.095	63.2	14.1
11:42:56	-83	16.5	78.7848	98.0457	108.671	118.076	125.397	128.779	109.626	63.5354	20.5051
11:53:01	-83	16.6	78.1764	98.5315	111.132	121.137	125.904	127.287	110.361	71.3058	19.2397
12:03:00	-83	16.6	76.7381	98.854	113.12	123.736	129.886	130.375	112.118	51.8865	13.0217
12:12:58	-84	16.7	76.3222	98.0457	113.961	126.283	133.869	134.817	113.883	41.4381	7.12375
12:22:59	-83	16.6	76.5304	96.2435	113.821	128.407	137.273	139.116	115.232	43.9268	6.68885
12:32:58	-83	16.5	76.7381	94.5754	113.681	130.497	140.482	143.841	116.636	63.4057	12.9215
12:42:56	-83	16.5	77.3578	93.39	114.1	131.106	143.175	148.093	117.87	63.612	15.2508
12:52:55	-83	16.5	76.5304	93.7302	113.821	132.194	145.381	152.436	119.015	40.3673	9.61603
13:02:55	-83	16.5	75.4834	93.5603	112.555	132.314	147.555	156.962	119.738	47.7	7.7
13:12:55	-83	16.5	73.1273	94.2382	112.414	133.034	149.803	161.362	120.663	41.3	5.5
13:22:55	-84	16.7	71.5876	94.2382	112.272	132.555	151.703	165.357	121.285	40.6	10.3
13:32:53	-83	16.6	70.9175	93.2194	112.555	132.794	153.994	169.633	122.186	48.2609	12.4415
13:42:53	-82	16.4	70.4673	91.4962	112.13	132.675	155.639	173.986	122.732	64	17.6
13:52:52	-82	16.4	70.241	89.917	112.13	133.154	156.759	176.168	123.062	50.2838	7.61269
14:02:53	-81	16.4	69.558	87.9485	112.838	133.631	157.973	179.302	123.542	31.0483	4.99168
14:12:52	-82	16.4	67.7028	86.8559	112.13	133.988	158.777	181.069	123.42	22.8381	3.90651
14:22:52	-81	16.4	65.0655	85.9348	109.836	133.869	159.177	182.818	122.783	33.8	5.1
14:32:52	-83	16.5	63.5809	84.8163	107.196	133.392	159.177	184.551	122.119	42.5	8.4
14:52:51	-80	16.4	58.9031	83.1103	104.945	133.034	158.877	187.969	121.14	44.6372	8.30692
15:02:51	-80	16.4	58.3602	81.7588	102.335	133.034	158.677	191.326	120.915	44.9	9
15:12:51	-79	16.4	56.1078	80.3846	100.767	132.914	160.075	197.063	121.219	33.5	6
15:22:52	-80	16.4	55.1638	78.3797	99.8153	131.469	160.571	200.267	120.944	28.0532	5.79035
15:32:52	-80	16.4	54.3206	76.7381	99.1755	130.009	161.559	204.98	121.13	18.9	1.7
15:42:52	-80	16.4	51.3691	74.6353	97.5575	128.531	162.639	209.587	120.72	10.3	1.8
15:52:52	-80	16.4	50.3363	72.0309	95.0789	126.911	163.907	215.577	120.64	7.4	1
16:02:52	-83	16.6	48.2044	69.7864	91.8434	125.524	165.837	217.78	119.829	9.8	1.8
16:12:51	-79	16.4	46.2498	68.1713	90.7977	126.157	168.219	224.261	120.643	18.4307	6.01002
16:22:50	-84	16.7	42.9303	65.7952	89.7398	124.761	169.914	222.122	119.21	9.51586	1.80301
16:32:51	-80	16.4	40.3307	64.0796	87.9485	122.573	171.034	217.78	117.291	23.2612	9.18469
16:42:43	-67	14.5	38.0567	62.8255	85.3774	120.213	170.662	214.837	115.329	8.31081	2.02703
16:52:52	-82	16.4	35.2788	61.8039	82.9186	117.806	172.332	212.603	113.79	8.96552	2.16749
17:02:50	-81	16.4	33.4256	60.7651	80.3846	116.447	172.424	210.345	112.299	9.83278	1.90635
17:12:48	-80	16.4	31.362	59.4411	79.3885	115.624	171.592	211.1	111.418	14.3478	3.2107
17:22:47	-80	16.4	33.4256	58.3602	78.7848	113.26	171.777	211.853	111.243	18.6311	3.70618
17:32:48	-80	13.5	34.8704	56.419	77.7682	111.704	171.406	214.095	111.044	3.39434	0.798669
17:42:55	-79	15	34.916	53.2554	77.5632	111.276	169.633	217.78	110.737	1.77924	0.691928
17:52:45	-79	11.8	33.71	50.996	76.9452	110.414	164.778	217.048	108.982	0.711864	0.610169
18:02:45	-79	12.1	30.3301	48.9579	75.4834	110.125	160.868	219.237	107.5	0.6	0.2
18:12:35	-64	12.8	25.731	47.2372	71.5876	106.75	155.126	214.095	103.421	0.813559	0.508475
18:22:46	-78	11.3	19.2156	45.2408	68.6366	104.031	150.967	201.061	98.192	0.981997	0.392799
18:32:50	-77	11.9	16.0769	43.4096	65.3097	102.335	148.093	191.326	94.425	0.397351	0.298013
18:42:48	-76	11.9	13.2675	41.536	63.8308	99.4959	143.73	177.159	89.8365	0.301003	0.100334
18:52:49	-74	11	9.67384	38.0148	61.5458	96.078	140.935	168.03	85.7128	0.698835	0.199667
19:02:40	-73	11.6	0	31.6651	55.106	87.0389	130.253	153.994	76.3429	0.101523	0
19:12:39	-72	11.1	0	24.85	50.1463	76.9452	118.48	140.369	68.465	0.100167	0
19:22:36	-71	11.5	0	21.9962	45.939	66.7558	106.6	130.131	61.9038	0.603015	0.40201
19:32:47	-71	11.7	0	19.0492	39.4933	57.8122	93.7302	120.742	55.1378	0.589198	0.294599
19:42:45	-70	12	0	15.3476	33.3302	49.4109	81.3686	112.697	48.6923	0.802676	0.602007
19:52:45	-69	9.2	0	12.0346	28.8786	44.71	69.3288	105.851	43.4672	0.5	0.4
20:02:45	-68	10.5	0	8.59348	24.3975	41.0736	60.239	96.2435	38.4245	0.5	0.5
20:12:46	-66	9.9	0	6.45744	21.1853	36.1698	54.4962	88.4897	34.4664	0.698835	0.499168
20:22:46	-65	9	0	2.78117	16.7271	29.5864	48.599	80.3846	29.6797	0.6	0.6
20:32:46	-63		0	0	9.86929	22.2122	42.4457	74.4217	24.8248	0.2	0.1
20:42:46	-56		0	0	4.82044	18.7969	37.5091	65.7952	21.1536	0	0
20:52:45	-53		0	0	0	14.1386	34.2254	59.4411	17.9675	0	0

## Sheet: G49490
Van Eaton, A.R., et al., 2022, Eruption dynamics leading to a volcanic thunderstorm—The January 2020 eruption of Taal volcano, Philippines: Geology, https://doi.org/10.1130/G49490.1
